# Supplementary material for: Synthesis and Characterization of Amorphous SiO2−FexOy Materials Starting from Iron Sulfate for Preliminary Studies of CO2 Adsorption
Source: MDPI journal article supplement (doi:10.3390/separations10060352), 2023-06-13
Supplement: s1 [file s1]

## Supporting Information

# Synthesis and characterization of amorphous $\text{SiO}_2\text{-Fe}_x\text{O}_y$ materials starting from iron sulfate for preliminary studies of $\text{CO}_2$ adsorption

Cătălin IANĂȘI<sup>1</sup>, Bogdan PASCU<sup>2,3</sup>, Nicoleta NEMEȘ<sup>3</sup> and Alexandru POPA<sup>1,\*</sup>

<sup>1</sup>Coriolan Drăgulescu" Institute of Chemistry, Bv. Mihai Viteazul, No. 24, RO-300223, Timișoara, Romania

<sup>2</sup>Politehnica University Timișoara, Faculty of Industrial Chemistry and Environmental Engineering, Victoriei Square, no. 2, Timișoara, 300006, România

<sup>3</sup>Renewable Energy Research Institute, Politehnica University Timișoara, 138 Gavril Musicescu Street, 300501 Timișoara, Romania

\* Correspondence: author: [alpopa\\_tim2003@yahoo.com](mailto:alpopa_tim2003@yahoo.com)

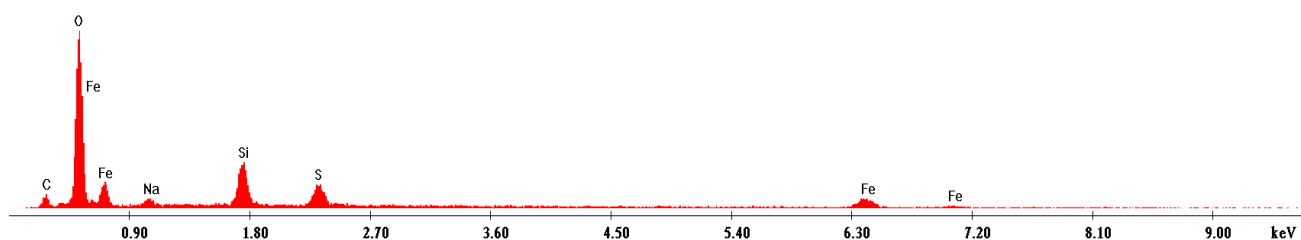

Figure S1. a. EDS images for the  $\text{SiO}_2\text{-Fe}_x\text{O}_y$  sample.

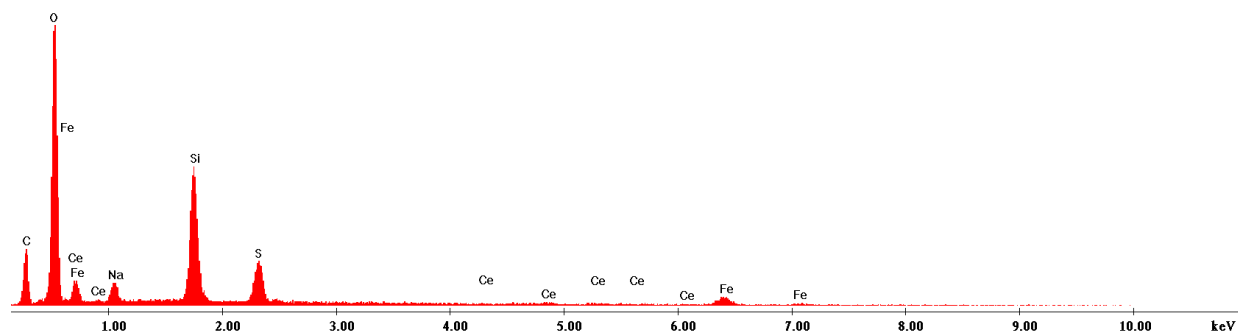

Figure S1. b. EDS images for the  $\text{SiO}_2\text{-Fe}_x\text{O}_y\text{-Ce}$  sample

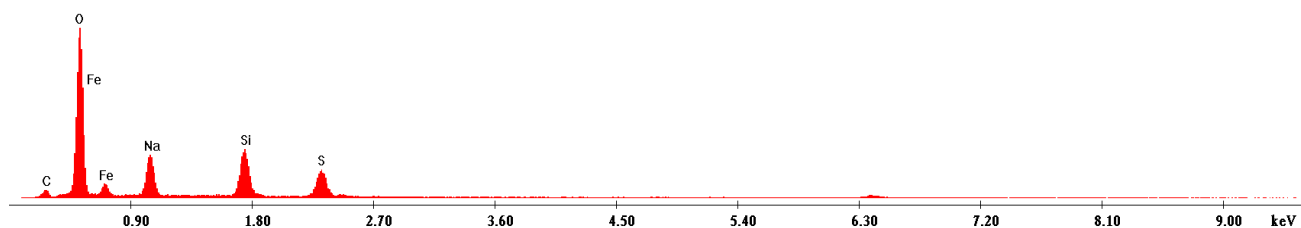

Figure S1. c. EDS images for the sample  $\text{SiO}_2\text{-Fe}_x\text{O}_y\text{-Li}$ .

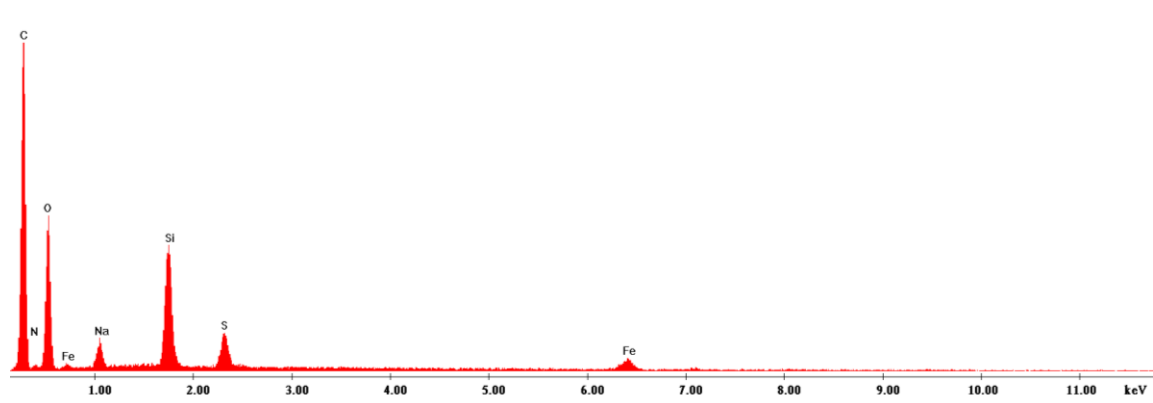

**Figure S2. a.** EDS images for the sample SiO<sub>2</sub>-Fe<sub>x</sub>O<sub>y</sub> – APTES

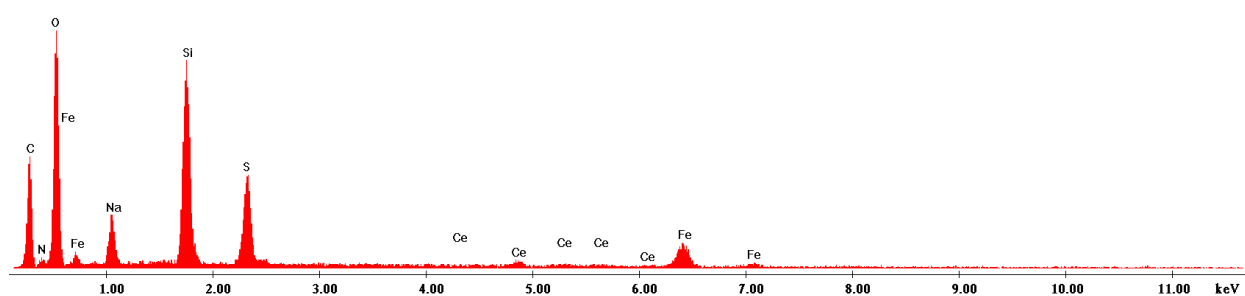

**Figure S2. b.** EDS images for sample SiO<sub>2</sub>-Fe<sub>x</sub>O<sub>y</sub> – Ce-APTES.

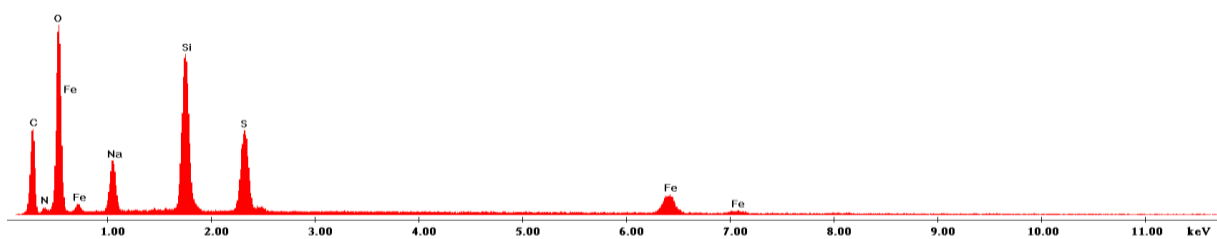

**Figure S2. c.** EDS images for the SiO<sub>2</sub>-Fe<sub>x</sub>O<sub>y</sub> – Li- APTES.
